# Supplementary material
Source: MDPI journal article supplement (https://www.mdpi.com/2571-6255/6/9/366)

## STRESSPLOT FOR TAXONOMIC COMMUNITY COMPOSITION

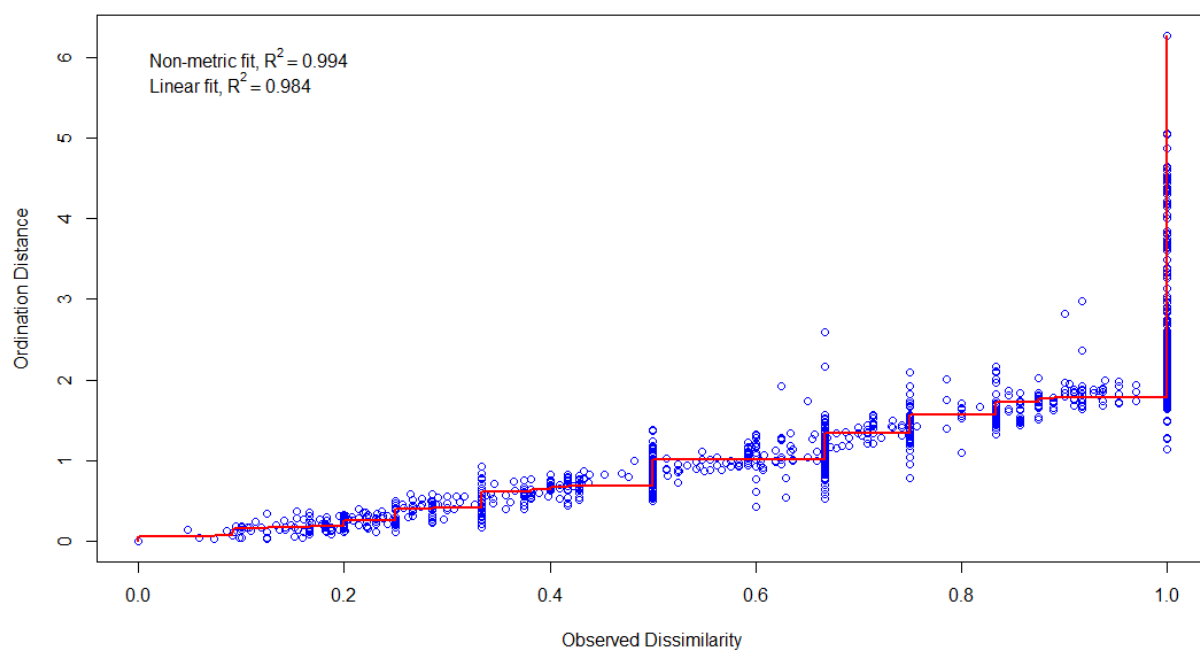

## STRESSPLOT FOR FUNCTIONAL COMMUNITY COMPOSITION

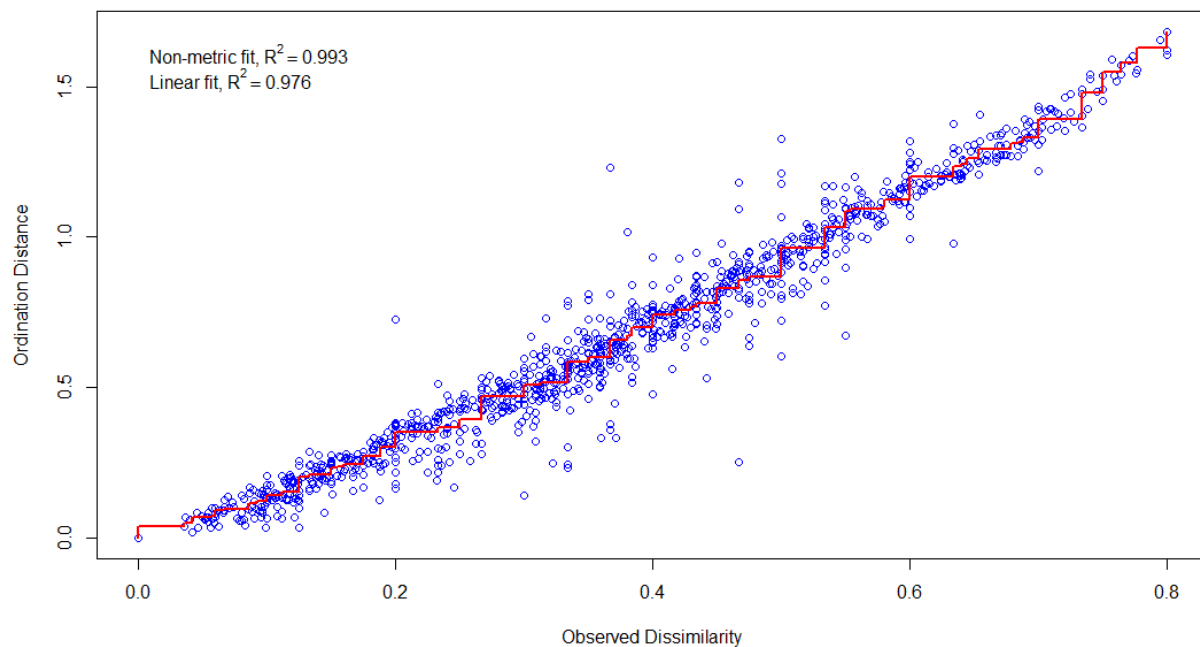

Supplement: s1 [file s1]
