# Supplementary material
Source: MDPI journal article supplement (https://www.mdpi.com/2571-6255/6/9/366)
Supplement: s1 [file s1]

Archive with 8 entries (8 files):
- Supplemental Data S1.xlsx
- Supplemental Data S2.xlsx
- Supplemental Data S3.csv
- Supplemental Data S4.csv
- Supplemental Data S5.zip
- Supplemental Data S6.pdf
- Supplemental Data S7.pdf
- Supplemental Data S8.pdf
