# Supplementary material
Source: MDPI journal article supplement (https://www.mdpi.com/2571-6255/6/9/366)
Supplement: s1 [file s1 › Supplemental Data S1.xlsx]

## Sheet: Sheet1
	Eagle Burn	Main Burn	Eagle Unburned (control)
Date	2017-02-20	2017-03-06	######
Temp Avg (deg F)	35	47	30
Temp. Max	51	56	43
Temp. Min	17	35	18
Relative Humidity Avg (%)	39	42	33
RH Max (%)	71	65	59
RH Min (%)	14	24	17
Wind Speed avg (mph)	3.4	5	4
WS max	15	21	19
WS min	0	0	0
