# Supplementary material
Source: MDPI journal article supplement (https://www.mdpi.com/2571-6255/6/9/366)
Supplement: s1 [file s1 › Supplemental Data S2.xlsx]

## Sheet: Sheet1
CBI ID	Point ID old	Point ID New	dNBR	CBI Total
PPS99	198		390.821	1.77778
PPS97	196		371.006	1.57895
PPS95	194		351.247	1.52778
PPS93	192		243.677	0.631579
PPS91	190		342.214	1.10526
PPS90	189		356.316	1.36842
PPS88	187		381.821	1.68421
PPS86	185		338.706	1.69444
PPS84	183		274.608	1.07895
PPS82	181		357.785	1.33333
PPS79	178		403.212	1.68421
PPS77	176		381.613	1.88889
PPS75	174		448.126	1.61111
PPS73	172		329.635	0.921053
PPS71	170		284.565	1.72222
PPS70	169		263.115	1.41667
PPS68	167		424.093	1.81579
PPS66	165		635.141	2.05263
PPS64	163		364.508	1.27778
PPS62	161		347.062	1.33333
PPS59	158		434.015	1.80556
PPS57	156		517.265	2.13158
PPS55	154		385.145	1.58333
PPS53	152		339.227	1.5
PPS51	150		285.025	1.15789
PPS50	149		230.867	1.30556
PPS48	147		409.018	1.88889
PPS46	145		419.061	1.63889
PPS44	143		390.217	1.52778
PPS42	141		333.918	1.30556
PPS39	138		337.645	1.11765
PPS37	136		371.379	1.61111
PPS35	134		412.289	1.72222
PPS33	132		376.914	1.77778
PPS31	130		317.586	1.38889
PPS30	129		275.572	1.5
PPS28	127		320.486	1.77778
PPS26	125		407.019	1.72222
PPS24	123		412.443	1.91667
PPS22	121		371.435	1.34211
PPS19	118		287.381	1.47222
PPS17	116		306.193	1.30556
PPS15	114		424.249	1.86111
PPS13	112		384.038	1.75
PPS11	110		260.812	0.916667
PPS10	109		299.392	1.55556
PPS8	107		367.814	1.27778
PPS6	105		277.776	1
PPS4	103		370.518	1.77778
PPS2	101		346.2	1.63889
PPN03	80	3	564.677	2.16667
PPN05	60	5	538.327	1.91667
PPN07	40	7	508.994	1.86111
PPN09	20	9	380.943	1.77778
PPN12	91	12	461.426	1.69444
PPN14	71	14	658.042	2.30556
PPN16	51	16	550.227	1.97222
PPN18	31	18	421.893	1.30556
PPN20	11	20	319.69	1.33333
PPN23	82	23	505.091	1.91667
PPN25	62	25	611.825	2.13889
PPN27	42	27	428.904	1.86111
PPN29	22	29	370.588	1.27778
PPN32	93	32	457.629	2.22222
PPN34	73	34	548.506	2.11111
PPN36	53	36	425.279	1.69444
PPN38	33	38	381.935	1.33333
PPN40	13	40	364.356	0.805556
PPN43	84	43	492.829	1.88889
PPN45	64	45	494.334	1.83333
PPN47	44	47	489.973	1.75
PPN49	24	49	395.455	1.80556
PPN52	95	52	444.765	1.83333
PPN54	75	54	603.149	2.25
PPN56	55	56	522.3	2.33333
PPN58	35	58	573.459	2.05556
PPN60	15	60	384.974	1.36111
PPN63	86	63	547.294	2.02778
PPN65	66	65	650.684	2
PPN67	46	67	680.029	2.36111
PPN69	26	69	438.268	1.97222
PPN72	97	72	454.783	1.63889
PPN74	77	74	511.153	1.97222
PPN76	57	76	693.628	2.22222
PPN78	37	78	605.767	2.19444
PPN80	17	80	395.907	1.61111
PPN83	88	83	456.884	1.19444
PPN85	68	85	663.844	1.91667
PPN87	48	87	663.853	2.27778
PPN89	28	89	472.408	1.91667
PPN94	79	94	434.034	1.55556
PPN96	59	96	614.747	2.19444
PPN98	39	98	568.362	2.27778
PPN00	19	100	370.784	1.41667
