# Supplementary material
Source: MDPI journal article supplement (https://www.mdpi.com/2571-6255/6/9/366)
Supplement: s1 [file s1 › Supplemental Data S3.csv]

				Morphology	Morphology	Morphology Size	Phenology	Physiology	Physiology	Ecology	Ecology	Ecology	Ecology	Ecology
Subfamily	Tribe	Species	Code	Wing Morphology	Mean Body Length (mm)		Breeding Season	Diet	Speed	Activity Time	Gregarious	Behavior	Light?	BenefitHuman
Trechinae	Bembidiini	Polyderis laeva	P.lae	Macropterous	1.5	Small	Unknown	Predator	Moderate	Nocturnal	Yes	Burrower	Yes	Yes
Harpalinae	Lebiini	Syntomus americanus	S.ame	Dimorphic	3.1	Small	Summer	Predator	Fast	Diurnal	Unknown	Climber	Yes	Yes
Nebriinae	Notiophilini	Notiophilus aeneus	N.aen	Macropterous	5.5	Small	Unknown	Predator	Fast	Diurnal	Yes	Climber	Yes	No
Harpalinae	Harpalini	Stenolophus comma	S.com	Macropterous	6.5	Small	Unknown	Omnivore	Slow	Cathemeral	Yes	Burrower	Yes	Yes
Harpalinae	Lebiini	Apenes sinuata	A.sin	Macropterous	7	Small	Unknown	Predator	Moderate	Nocturnal	No	Unknown	Yes	No
Harpalinae	Zabrini	Amara aenea	A.aen	Macropterous	7.6	Small	Spring, Summer	Omnivore	Moderate	Diurnal	Yes	Climber	Yes	Yes
Harpalinae	Oodini	Oodes amaroides	O.ama	Macropterous	8.95	Small	Unknown	Predator	Moderate	Cathemeral	Unknown	Swimmer, Climber	Yes	No
Harpalinae	Harpalini	Selenophorus opalinus	S.opa	Macropterous	9.95	Medium	Unknown	Predator	Moderate	Nocturnal	Yes	Climber	Yes	Yes
Harpalinae	Sphodrini	Synuchus impunctatus	S.imp	Dimorphic	9.95	Medium	Fall	Omnivore	Moderate	Nocturnal	Unknown	Climber, Burrower	Yes	Yes
Harpalinae	Platynini	Platynus tenuicollis	P.ten	Macropterous	11.25	Medium	Unknown	Predator	Moderate	Nocturnal	Unknown	Climber	Yes	No
Cicindelinae	Cicindelini	Cicindela punctulata	C.pun	Macropterous	11.5	Medium	Summer, Fall	Predator	Fast	Cathemeral	Yes	Climber	Yes	Yes
Cicindelinae	Cicindelini	Cicindela sexguttata	C.sex	Macropterous	12	Medium	Spring, Summer	Predator	Fast	Diurnal	Yes, No	Unknown	No	No
Cicindelinae	Cicindelini	Cincindela patruela	C.pat	Macropterous	13	Medium	Spring, Summer	Predator	Fast	Diurnal	Unknown	Unknown	No	No
Carabinae	Cychrini	Scaphinotus sp.	Scaph	Brachypterous	13.25	Medium	Unknown	Predator	Moderate	Nocturnal	Yes	Burrower	No	No
Harpalinae	Lebiini	Cymindis americana	C.ame	Dimorphic	13.25	Medium	Unknown	Predator	Moderate	Nocturnal	Yes	Burrower	No	Yes
Cicindelinae	Cicindelini	Cicindela unipunctata	C.uni	Macropterous	16	Large	Summer	Predator	Fast	Diurnal	No	Unknown	No	No
Harpalinae	Licinini	Dicaelus elongatus	D.elo	Brachypterous	16.5	Large	Unknown	Predator	Moderate	Nocturnal	Yes	Climber	No	No
Harpalinae	Galeritini	Galerita janus	G.jan	Macropterous	19.5	Large	Unknown	Omnivore	Fast	Nocturnal	Yes	Climber	Yes	Yes
Carabinae	Carabini	Calosoma calidum	C.cal	Macropterous	23	Large	Spring, Summer	Predator	Moderate	Cathemeral	Unknown	Swimmer	Yes	Yes
Carabinae	Carabini	Calosoma sycophanta	C.syc	Macropterous	23.5	Large	Summer	Predator	Moderate	Cathemeral	Yes	Climber	Yes	No
Carabinae	Carabini	Carabus vinctus	C.vin	Brachypterous	24	Large	Unknown	Predator	Moderate	Nocturnal	Unknown	Unknown	Yes	No
Carabinae	Carabini	Carabus sylvosus	C.syl	Brachypterous	25.5	Large	Summer	Predator	Moderate	Nocturnal	Unknown	Unknown	Yes	No
Scaritinae	Pasimachini	Pasimachus depressus	P.dep	Brachypterous	27.5	Large	Summer	Predator	Slow	Nocturnal	Unknown	Burrower	Unknown	No
