# Supplementary material
Source: MDPI journal article supplement (https://www.mdpi.com/2571-6255/6/9/366)
Supplement: s1 [file s1 › Supplemental Data S4.csv]

	Treatment	Year	C.cal	C.syc	C.syl	C.vin	Scaph	C.pun	C.sex	C.uni	C.pat	A.aen	A.sin	C.ame	D.elo	G.jan	O.ama	P.ten	S.opa	S.ame	S.imp	S.com	N.aen	P.dep	P.lae
High1.2017	High	2017	0	0	0	0	0	0	0	0	0	0	0	0	0	0	0	0	0	0	0	0	0	0	0
High2.2017	High	2017	0	0	0	0	0	0	0	0	0	0	0	0	0	0	0	0	1	0	0	0	0	0	0
High3.2017	High	2017	0	0	0	0	0	0	0	0	0	0	0	0	0	0	0	1	0	0	1	0	0	1	0
High4.2017	High	2017	0	0	0	0	0	0	0	0	0	0	0	0	0	1	0	0	0	0	1	0	0	1	0
High5.2017	High	2017	0	0	0	0	0	0	0	0	0	0	0	0	0	0	0	0	0	0	0	0	0	2	0
High6.2017	High	2017	0	0	0	0	0	0	0	0	0	0	0	0	0	0	0	0	0	0	0	0	0	1	0
High7.2017	High	2017	0	0	0	0	0	0	0	0	0	0	0	0	0	0	0	1	0	0	0	0	0	0	0
High8.2017	High	2017	0	0	0	0	0	0	0	0	0	0	0	1	0	0	0	0	0	0	0	0	0	1	0
High9.2017	High	2017	0	0	0	0	0	0	0	0	0	0	0	0	0	0	0	0	0	0	0	0	0	1	0
Con1.2017	Control	2017	0	0	0	0	0	0	0	0	0	0	0	0	0	2	1	1	0	1	0	0	0	0	0
Con2.2017	Control	2017	0	0	0	0	1	0	0	0	0	0	0	0	0	0	0	1	0	0	0	0	0	9	0
Con3.2017	Control	2017	0	0	0	0	0	0	0	0	0	0	0	0	0	1	0	0	0	0	0	0	0	11	3
Con4.2017	Control	2017	0	0	0	0	0	0	1	2	0	0	0	0	0	1	0	0	0	1	0	0	0	28	0
Con5.2017	Control	2017	0	0	0	0	0	0	0	1	0	0	0	0	0	1	0	0	0	0	0	0	0	19	0
Con6.2017	Control	2017	0	0	0	0	0	0	0	0	0	0	0	0	1	0	0	0	0	0	0	0	0	10	0
Con7.2017	Control	2017	0	0	0	0	0	0	0	0	0	0	1	0	0	0	0	0	0	0	0	0	0	9	1
Con8.2017	Control	2017	0	0	0	0	0	0	0	0	0	0	0	0	0	0	0	0	0	0	0	0	0	2	0
Con9.2017	Control	2017	0	0	0	0	0	0	0	0	0	0	0	2	0	0	0	0	0	0	0	0	1	0	0
Mid1.2017	Mid	2017	0	0	0	0	0	0	0	0	0	0	0	0	0	3	0	0	0	0	0	0	0	0	0
Mid2.2017	Mid	2017	0	0	0	0	0	0	0	0	0	0	0	0	0	0	0	0	0	0	0	0	0	0	1
Mid3.2017	Mid	2017	0	0	0	0	0	0	0	0	0	0	0	0	0	1	0	0	0	0	0	0	0	1	1
Mid4.2017	Mid	2017	0	1	0	0	0	0	0	0	0	0	0	0	0	14	0	0	0	0	1	0	0	11	0
Mid5.2017	Mid	2017	0	0	2	0	0	0	0	1	0	0	0	0	0	12	0	0	0	0	0	0	0	5	0
Mid6.2017	Mid	2017	0	0	1	0	0	0	0	0	0	0	0	0	0	2	0	0	0	0	0	0	0	4	0
Mid7.2017	Mid	2017	0	0	0	1	0	0	0	0	0	0	0	0	0	7	0	0	0	0	0	0	0	4	0
Mid8.2017	Mid	2017	0	0	0	0	0	0	0	0	0	0	0	0	0	1	0	0	0	0	0	0	0	1	0
Mid9.2017	Mid	2017	0	0	0	0	0	0	0	0	0	0	0	0	0	0	0	0	0	0	0	0	0	0	0
High1.2018	High	2018	0	0	1	0	0	0	0	0	0	1	0	0	0	0	0	2	0	0	0	0	0	0	8
High2.2018	High	2018	0	0	0	0	0	0	0	0	0	0	0	0	0	0	0	1	0	0	0	0	0	0	2
High3.2018	High	2018	0	0	1	0	0	0	0	0	0	0	0	0	0	0	0	1	1	0	0	0	0	2	7
High4.2018	High	2018	0	0	0	0	0	0	0	0	1	0	0	0	3	0	0	0	0	0	0	0	0	2	6
High5.2018	High	2018	0	0	1	0	0	1	0	0	1	0	0	0	1	0	0	0	0	0	0	0	0	2	2
High6.2018	High	2018	0	0	0	0	0	0	0	0	0	0	0	0	0	0	0	0	0	0	0	0	0	1	0
High7.2018	High	2018	0	0	0	0	0	0	0	0	0	0	0	0	2	0	0	0	0	0	0	0	0	6	1
High8.2018	High	2018	0	0	0	0	0	0	0	0	0	0	0	0	2	0	0	0	0	0	0	0	0	4	2
High9.2018	High	2018	0	0	0	0	0	0	0	0	0	0	0	1	0	0	0	0	0	0	0	0	0	4	0
High10.2018	High	2018	0	0	0	0	0	0	0	0	0	0	0	0	0	0	0	0	0	0	0	0	0	0	0
Con1.2018	Control	2018	0	0	0	0	0	0	0	0	0	0	0	0	0	0	0	0	0	0	0	1	0	0	2
Con2.2018	Control	2018	0	0	0	0	0	0	0	0	0	0	0	0	0	0	0	0	0	0	0	0	0	1	1
Con3.2018	Control	2018	0	0	1	0	0	0	0	0	0	0	0	0	1	0	0	0	0	0	0	0	0	13	1
Con4.2018	Control	2018	0	0	0	0	0	0	0	0	0	0	0	0	0	0	0	0	0	0	0	0	0	20	8
Con5.2018	Control	2018	0	0	0	0	0	0	0	1	0	0	0	0	0	0	0	0	0	0	0	0	0	10	1
Con6.2018	Control	2018	0	0	0	0	0	0	0	1	0	0	0	0	0	0	0	0	0	0	0	0	0	16	0
Con7.2018	Control	2018	0	0	0	0	0	0	0	0	0	0	0	0	1	2	0	0	0	0	0	0	0	10	0
Con8.2018	Control	2018	0	0	0	0	0	0	0	1	0	0	0	0	0	0	0	0	0	2	0	0	0	15	3
Con9.2018	Control	2018	0	0	0	0	0	0	0	0	0	0	0	1	0	0	0	0	0	0	0	0	0	6	1
Con10.2018	Control	2018	0	0	0	0	0	0	0	0	0	0	0	0	0	0	0	0	0	0	0	0	0	2	0
Mid1.2018	Mid	2018	0	0	0	0	0	0	0	0	0	0	0	0	1	2	0	3	0	0	0	0	0	0	8
Mid2.2018	Mid	2018	1	0	0	0	0	0	0	0	0	0	0	0	0	2	0	0	0	0	0	0	0	0	1
Mid3.2018	Mid	2018	0	0	0	0	0	0	0	0	0	0	0	0	0	1	0	0	0	0	0	0	0	0	2
Mid4.2018	Mid	2018	0	0	0	0	0	0	0	0	0	0	0	0	0	0	0	0	0	0	0	0	0	3	2
Mid5.2018	Mid	2018	0	0	0	0	0	0	0	0	0	0	0	0	1	0	0	0	0	0	0	0	0	4	0
Mid6.2018	Mid	2018	0	0	0	0	0	0	0	0	0	0	0	0	0	0	0	0	0	0	0	0	0	4	0
Mid7.2018	Mid	2018	0	0	0	0	0	0	0	0	0	0	0	0	0	2	0	0	0	0	0	0	0	0	0
Mid8.2018	Mid	2018	0	0	0	0	0	0	0	1	0	0	0	0	0	1	0	0	0	0	0	0	0	2	2
Mid9.2018	Mid	2018	0	0	0	0	0	0	0	0	0	0	0	0	0	2	0	0	0	0	0	0	0	5	1
Mid10.2018	Mid	2018	0	0	1	0	0	0	0	0	0	0	0	0	0	0	0	0	0	0	1	0	0	1	0
