# Supplementary material
Source: MDPI journal article supplement (https://www.mdpi.com/2571-6255/6/9/366)

## Supplemental Data S7:

Visual comparison between our unburned control site (first), moderate severity fire (second) and high severity fire (third).

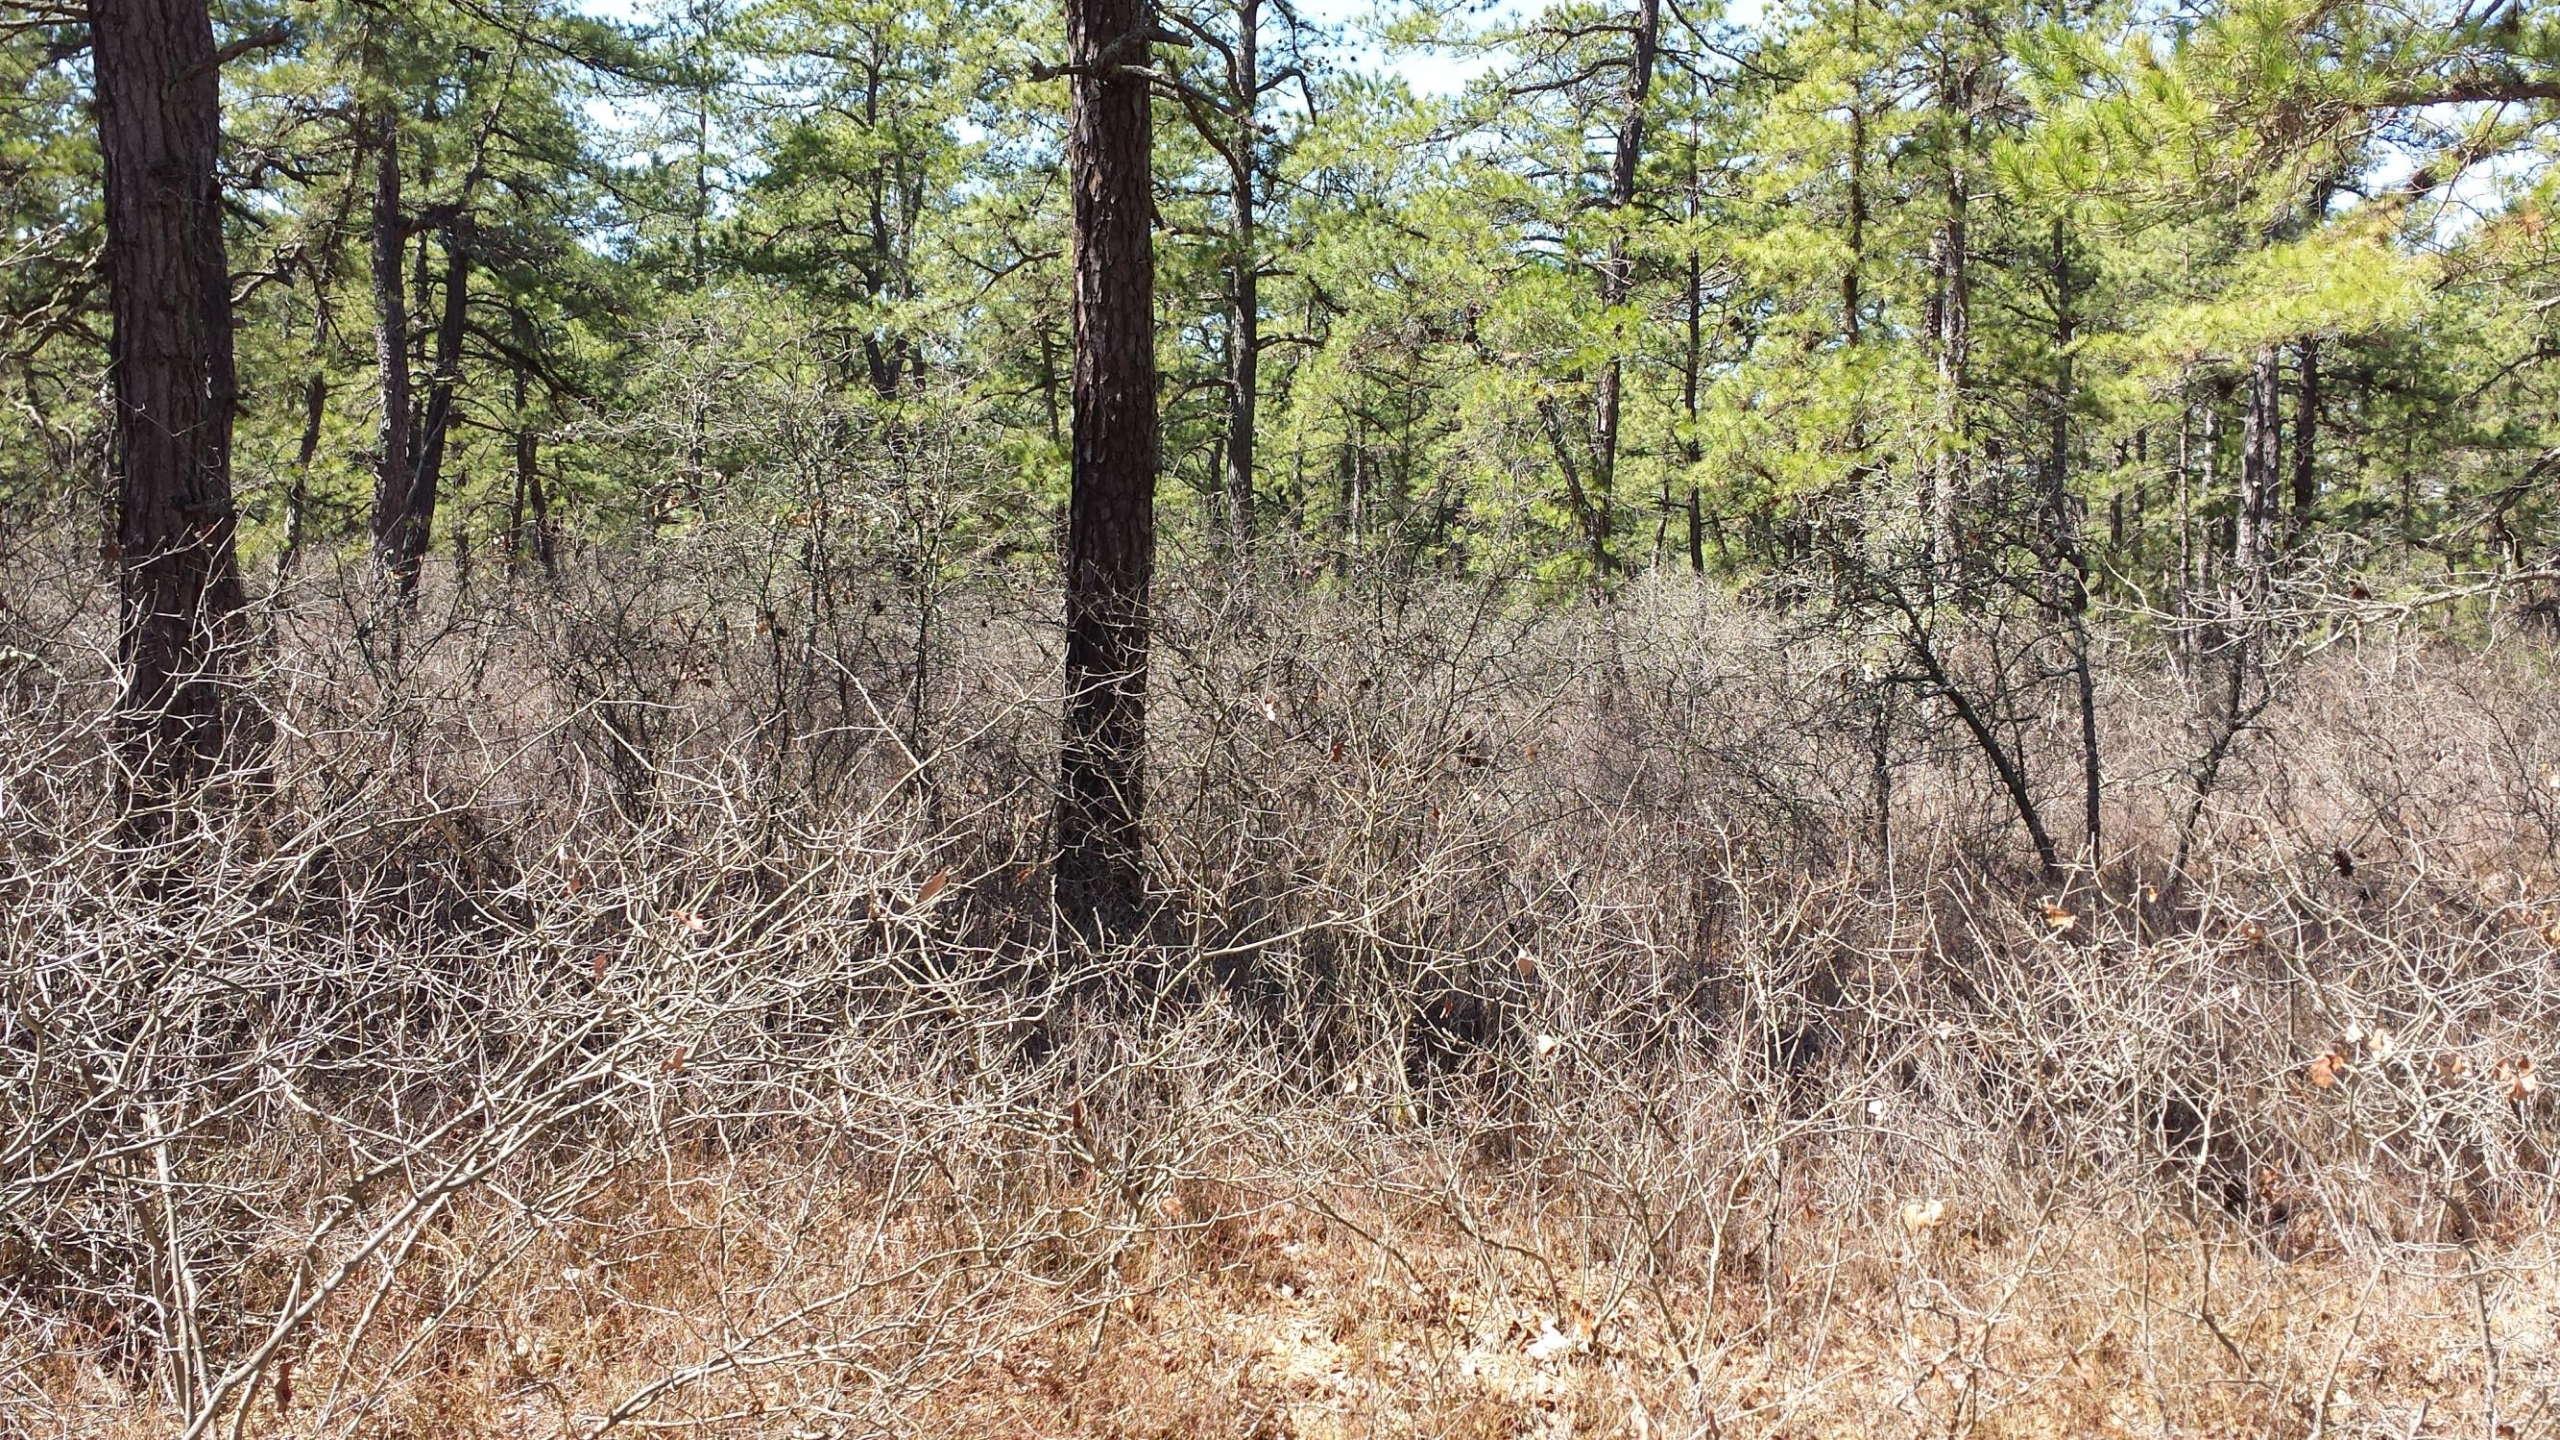

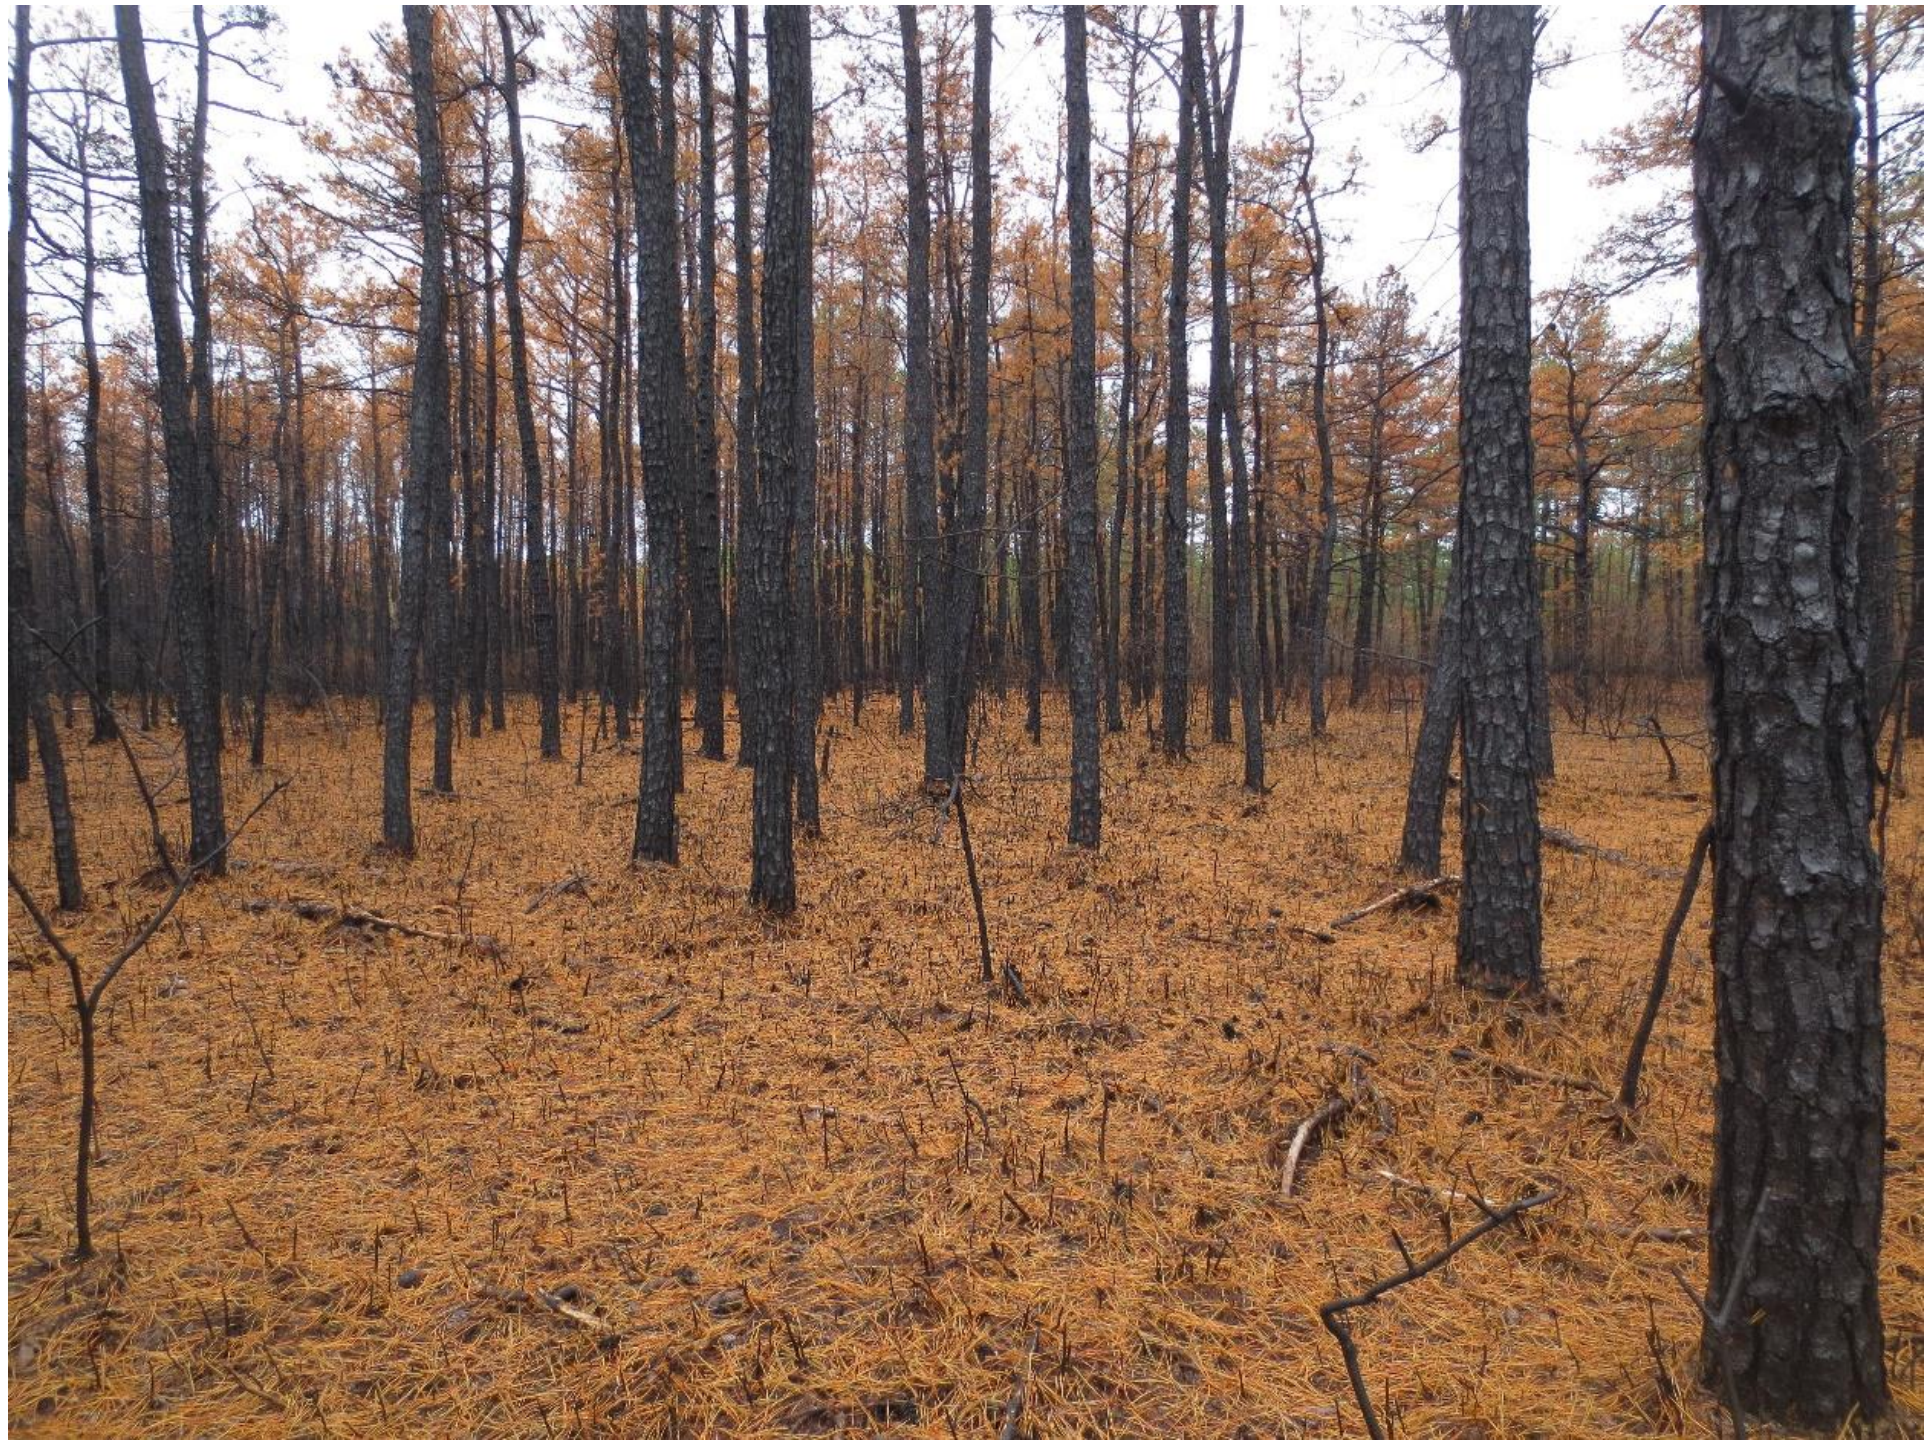

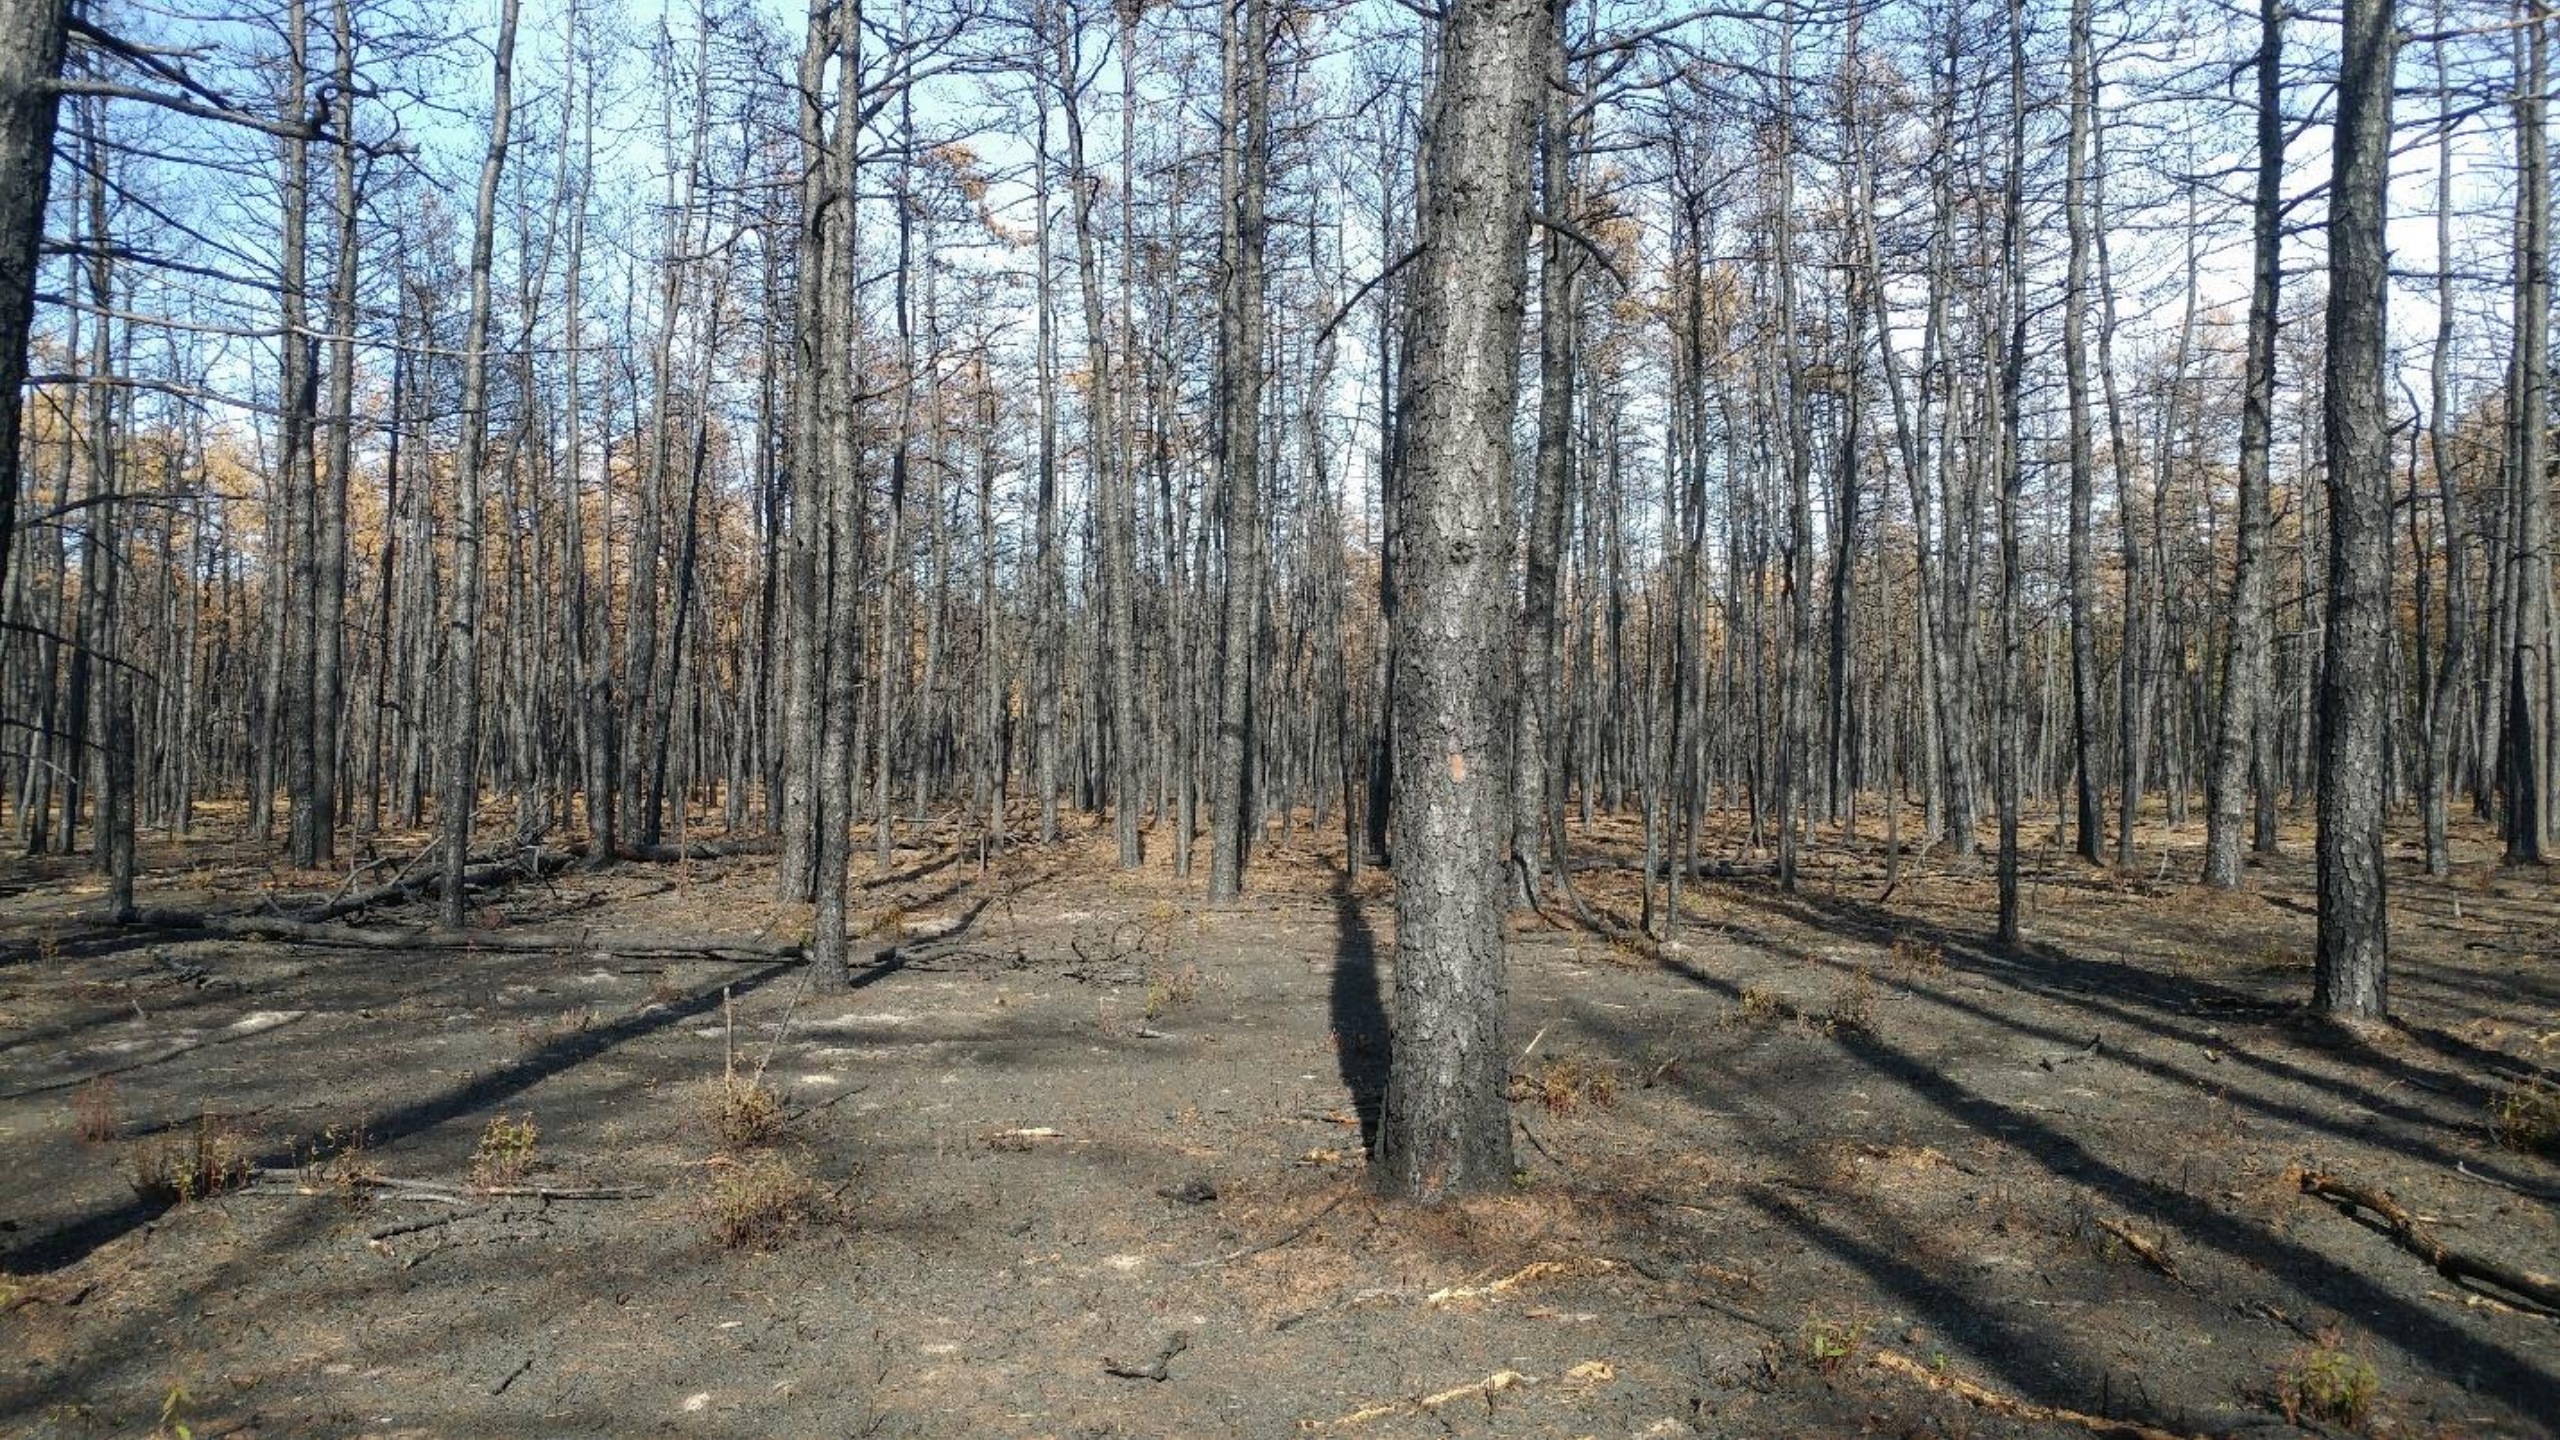

Supplement: s1 [file s1 › Supplemental Data S7.pdf]
