# Supplementary material
Source: MDPI journal article supplement (https://www.mdpi.com/2571-6255/6/9/366)
Supplement: s1 [file s1 › Supplemental Data S8.pdf]

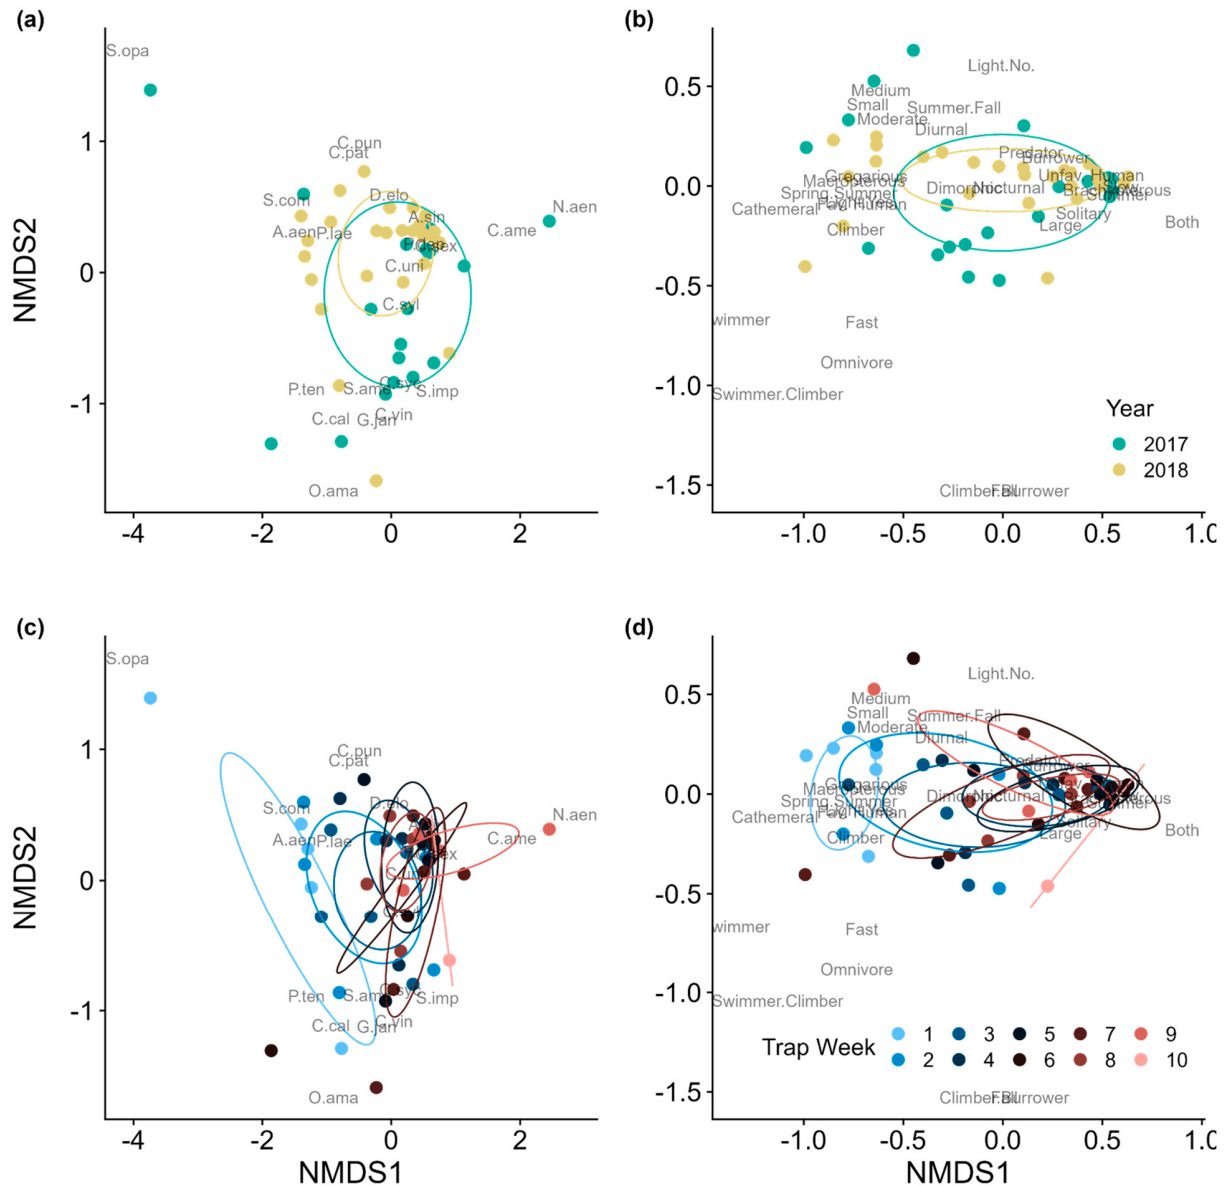

**Supplemental Data S8.** Non-metric multidimensional scaling output for (a,c) taxonomic and (b,d) functional community composition for carabid communities in our trap data (note that the NMDS axes are not shared across panels). According to our PERMANOVA analysis (Table 1), significant differences in taxonomic composition across traps was found between years ( $p < 0.05$ ). Variation in functional composition was not explained well by year (Table 1). Variation in both taxonomic and functional composition was well explained by trap week (Table 1).
